# Supplementary material for: Thyroid dysfunction in pregnancy - a retrospective observational analysis of a Maltese cohort
Source: PubMed Central journal article supplement (PMC9756451; doi:10.1186/s12884-022-05266-x), 2022-12-15
Supplement: 12884_2022_5266_MOESM1_ESM.pdf [file 12884_2022_5266_MOESM1_ESM.pdf]

# NATIONAL OBSTETRIC INFORMATION SHEET (NOIS)

Hospital: \_\_\_\_\_ Code: |\_|\_|

Case identification code ..... |\_|\_|\_|\_|\_|\_|\_|\_|\_|\_|

(A separate and unique code is to be given for each infant delivered, according to the agreed format)

## ***Mother's details***

|                                 |                       |
|---------------------------------|-----------------------|
| Identity number .....           | _ _ _ _ _ _ _ _ _     |
| First name .....                | _____                 |
| Surname .....                   | _____                 |
| Maiden surname .....            | _____                 |
| Address (1) .....               | _____                 |
| Address (2) and Post code ..... | _____                 |
| Infant ID _____                 | Infant C number _____ |
| Infant Name _____               | Infant DOB _____      |

Locality of residence .....

Locality code (*office use*) ..... |\_|\_|\_|\_|

Current Nationality ..... |\_|\_|\_|

Migrant (0 = No, 1 = Yes, 9 = UN) ..... |\_|

Resident (since 1 year) (0 = No, 1 = Yes, 9 = UN) ..... |\_|

Country of Birth ..... |\_|\_|

Date of birth (dd/mm/yyyy) (*only the year is mandatory*) ..... |\_|\_|\_|\_|\_|\_|\_|\_|

Legal Marital status

(1 = Single (never married), 2 = Married 3 = Widowed / separated / divorced /annulled 9 = UN) ..... |\_|

Mother's education – highest completed level

(1 =None, 2 =Special School, 3 =Primary,4 =Secondary, 5 =Post secondary, 6 =Non-tertiary, 7 =Tertiary, 9 =UN) .... |\_|

Mother's occupation in pregnancy \_\_\_\_\_

(*Office use: ISCO code*) ..... |\_|\_|\_|\_|

Father's Age (88 = Un-acknowledged Father, 99 = UN) ..... |\_|\_|

Father's Nationality (if not Maltese) ..... |\_|\_|\_|

Father's occupation \_\_\_\_\_

(*Office use: ISCO code*) ..... |\_|\_|\_|\_|

|                                     |
|-------------------------------------|
| Forms completed by _____ on _____ . |
|-------------------------------------|

Data is collected in accordance with Data Protection Requirements

**Past History** (before the present pregnancy/confinement)

**Past Medical History of note prior to this pregnancy** (0 = No, 1 = Yes, 9 = UN) .....|\_|

NIDDM – Pre-existing Non Insulin Dependant Diabetes Mellitus (0 = No, 1 = Yes, 9 = UN) ...|\_|

IDDM – Pre-existing Insulin Dependant Diabetes Mellitus (0 = No, 1 = Yes, 9 = UN) .....|\_|

Pre-existing Hypertension (0 = No, 1 = Yes, 9 = UN) .....|\_|

Cardiovascular disease (0 = No, 1 = Yes, 9 = UN) .....|\_|

Depression (0 = No, 1 = Yes, 9 = UN) .....|\_|

Asthma (0 = No, 1 = Yes, 9 = UN) .....|\_|

Epilepsy (0 = No, 1 = Yes, 9 = UN) .....|\_|

DVT – Deep Vein Thrombosis (0 = No, 1 = Yes, 9 = UN) .....|\_|

Thalassemia (0 = No, 1 = Yes, 9 = UN) .....|\_|

Sickle cell Anemia (0 = No, 1 = Yes, 9 = UN) .....|\_|

HIV (0 = No, 1 = Yes, 9 = UN) .....|\_|

Hepatitis (Hep A, B, or C) (0 = No, 1 = Yes, 9 = UN) Specify \_\_\_\_\_|\_|

Other Infection including STD (0 = No, 1 = Yes, 9 = UN) Specify \_\_\_\_\_|\_|

Other Pathology (specify below) (0 = No, 1 = Yes, 9 = UN) .....|\_|

Rubella vaccination (0 = No, 1 = Yes, 9 = UN) .....|\_|

Past transfusion (0 = No, 1 = Yes, 9 = UN) .....|\_|

Pelvic fractures (0 = No, 1 = Yes, 9 = UN) .....|\_|

Past surgery (0 = No, 1 = Yes, 9 = UN) Specify \_\_\_\_\_|\_|

Pre-existing Thyroid problems  
(0 = No, 1=Yes, NOS, 2=Hypothyroid, 3= Hyperthyroid, 4= Other, 9 = UN) .....|\_|

Female Genital Mutilation  
(0 = No, 1 = Yes, Type I, 2 = Yes, Type II, 3= Yes, Type III, 4= Yes, Type IV, 5 = Yes, NOS, 9 = UN) .....|\_|

Other Past Medical History of note - \_\_\_\_\_|\_|\_|\_|\_|\_|\_|\_|

(Office use: ICD-10 code) - \_\_\_\_\_|\_|\_|\_|\_|\_|\_|\_|

**Past Gynae History of note prior to this pregnancy** (0 = No, 1 = Yes, 9 = UN) .....|\_|

Infertility (0 = No, 1 = Yes, 9 = UN) .....|\_|

Previous assisted conception/ infertility treatment (0 = No, 1 = Yes, 9 = UN) .....|\_|

Pelvic inflammatory disease PID (0 = No, 1 = Yes, 9 = UN) .....|\_|

Postnatal depression (0 = No, 1 = Yes, 9 = UN) .....|\_|

Past Gynae Surgery (0 = No, 1 = Yes, 9 = UN) Specify \_\_\_\_\_|\_|

Other Past Gynae History of note (0 = No, 1 = Yes, 9 = UN) .....|\_|

Specify \_\_\_\_\_|\_|\_|\_|\_|\_|\_|\_|

\_\_\_\_\_|\_|\_|\_|\_|\_|\_|\_|

Case identification code ..... | | | | | | | | | | | | | | | |

**Past Obstetric History**

Spontaneous miscarriages (b.wt. under 500g and/or below 22 wks gestation) (number) ..... | | | |  
 Induced abortions (number) ..... | | | |  
 Ectopic pregnancies (number) ..... | | | |  
 Vaginal deliveries (number) ..... | | | |  
 Caesarean sections (number) ..... | | | |  
 Number of livebirths (in all) ..... | | | |  
     Number of livebirths who died in 1<sup>st</sup> week of life (early neonatal dth) ..... | | | |  
     Number of livebirths who died in 2<sup>nd</sup>, 3<sup>rd</sup> or 4<sup>th</sup> weeks of life (late neonatal dth) ..... | | | |  
 Number of still births (b.wt. 500g or more, or gestation 22 wks or more) ..... | | | |  
 Number of preterm deliveries (before completing 37 wks of gestation) ..... | | | |  
 Complications in previous pregnancies (eg. IGT, GDM, PIH, DVT, molar preg.) ..... | | | | | | | |  
 ..... | | | | | | | |

**Present Obstetric History**

Last menstrual period (dd/mm/yyyy) ..... | | | | | | | | | | | | | | | |  
 Certainty of LMP – Last Menstrual Period (0 = No, 1 = Yes, certain, 9 = UN) ..... | | | |  
 Regular menstrual cycle (0 = No, 1 = Yes, 9 = UN) ..... | | | |  
 Expected date of delivery (EDD) by dates (dd/mm/yyyy) ..... | | | | | | | | | | | | | | | |  
 Expected date of delivery (EDD) by ultrasound (dd/mm/yyyy) ..... | | | | | | | | | | | | | | | |  
 Planned Pregnancy (0 = No, 1 = Yes, 9 = UN) ..... | | | |  
 Contraception at time of current conception (0 = No, 1 = Yes, 9 = UN) ..... | | | |  
 Assisted fertilisation (0 = No, 1 = Yes, NOS, 2 = Induction of ovulation only, 3 = Artificial insemination, 4 = Implantation of ovum /ova (IVF) / ICSI, 9 = UN) ..... | | | |  
 Cigarette smoking during pregnancy (0 = None, 1 = Stopped in pregnancy, 2 = still smoking, 9 = UN) .. | | | |  
     No. of cigs per day ..... | | | |  
 Alcohol use during this pregnancy (0 = None, 1 = Stopped in pregnancy, 2 = still drinking, 9 = UN) ... | | | |  
     No. of units per week ..... | | | |  
 Illicit Drug abuse during pregnancy (0 = No, 1 = Yes, 9 = UN) Specify ..... | | | |  
 Non prescribed medicinal drug **abuse** during pregnancy (0 = No, 1 = Yes, 9 = UN) ..... | | | |  
 Drugs or Medications Abused ..... | | | | | | | | | | | | | | | |  
 (Office use: ATC - code) ..... | | | | | | | | | | | | | | | |

**Medications during 1<sup>st</sup> trimester of pregnancy**

Folic Acid. (0 = No, 1 = Yes NOS, 2 = Yes started before pregnancy, 3 = Yes started in 1<sup>st</sup> trimester, 4 = Yes started after 1<sup>st</sup> trimester, 9 = UN) .....

Iron Supplements (0 = No, 1 = Yes NOS, 2 = Yes started before pregnancy, 3 = Yes started in 1<sup>st</sup> trimester, 4 = Yes started after 1<sup>st</sup> trimester, 9 = UN) .....

Multivitamins (0 = No, 1 = Yes NOS, 2 = Yes started before pregnancy, 3 = Yes started in 1<sup>st</sup> trimester, 4 = Yes started after 1<sup>st</sup> trimester, 9 = UN) .....

**Chronic Medication History of note in 1<sup>st</sup> trimester** (0 = No, 1 = Yes, 9 = UN) .....

Infertility treatment – (G03G) (0 = No, 1 = Yes, 9 = UN) .....

Progestogens – (G03D) (0 = No, 1 = Yes, 9 = UN) .....

Aspirin – (B01AC06) (0 = No, 1 = Yes, 9 = UN) .....

Antiemetics – (A04) (0 = No, 1 = Yes, 9 = UN) .....

Antiasthmatics – (R03) (0 = No, 1 = Yes, 9 = UN) .....

Antihypertensives – (C02) (0 = No, 1 = Yes, 9 = UN) .....

Antidiabetics – (A10) (0 = No, 1 = Yes, 9 = UN) .....

Antiepileptics – (N03) (0 = No, 1 = Yes, 9 = UN) .....

Antidepressants – (N06A) (0 = No, 1 = Yes, 9 = UN) .....

Thyroxine – (H03AA01) (0 = No, 1 = Yes, 9 = UN) .....

Antibiotics – (J01) (0 = No, 1 = Yes, 9 = UN) .....

**Other medication in 1<sup>st</sup> Trimester** (0 = No, 1 = Yes, 9 = UN) .....

Specify  
 (Office use: ATC - code) 1 - .....   
 2 - .....

**Antenatal Examination:**

Date of First antenatal visit (dd/mm/yyyy) .....

Gestation at First antenatal visit (week of gestation) 99 = UN .....

Number of Antenatal visits (if exact number is uncertain <4 = 33, >=4=44, UN=99) .....

Height (nearest cm) (999 = UN) .....

Weight before pregnancy (nearest kg) (999 = UN) .....

Weight at delivery (nearest kg) (999 = UN) .....

**Ultrasound scans during pregnancy**

Number of scans (if exact number is uncertain <4 = 33, >=4=44, UN=99) .....

First recorded scan (week of pregnancy) (99 = UN) .....

Last recorded scan (week of pregnancy) (99 = UN) .....

Detailed anomaly scan for malformations (0 = No, 1 = Yes, 9 = UN) .....

**Fetal Anomalies detected by US** (0 = No, 1 = Yes, 9 = UN) Specify .....

If yes – Date at first anomaly detection US (dd/mm/yyyy) .....

Gestation at first anomaly detection by US (in weeks) .....

**Multiple gestation detected** (0=No, 1=Yes, NOS, 2=Yes, monochorionic, 3=Yes, dichorionic, 9=UN) ....

If yes – Gestation at first diagnostic US (in weeks) .....

**Screening in pregnancy:**

- Thalassemia (0 = No, 1 = Yes, result +ve, 2 = Yes, result -ve, 3 = Yes, result nk, 9 = UN) .....|\_|
- Sickle cell (0 = No, 1 = Yes, result +ve, 2 = Yes, result -ve, 3 = Yes, result nk, 9 = UN) .....|\_|
- Hepatitis B (0 = No, 1 = Yes, result +ve, 2 = Yes, result -ve, 3 = Yes, result nk, 9 = UN) .....|\_|
- Hepatitis C (0 = No, 1 = Yes, result +ve, 2 = Yes, result -ve, 3 = Yes, result nk, 9 = UN) .....|\_|
- HIV (0 = No, 1 = Yes, result +ve, 2 = Yes, result -ve, 3 = Yes, result nk, 9 = UN) .....|\_|  
 If yes – Anti viral treatment given: (0 = No, 1 = Yes, 9 = UN) .....|\_|
- Syphilis (0 = No, 1 = Yes, result +ve, 2 = Yes, result -ve, 3 = Yes, result nk, 9 = UN) .....|\_|  
 If yes – treatment given: (0 = No, 1 = Yes, 9 = UN) .....|\_|
- Grp B Strep (0 = No, 1 = Yes, result +ve, 2 = Yes, result -ve, 3 = Yes, result nk, 9 = UN) .....|\_|  
 If yes – treatment given: (0 = No, 1 = Yes, 9 = UN) .....|\_|
- Other Screening Specify: \_\_\_\_\_ .....|\_|\_|\_|\_|\_|\_|\_|

**Immunity Status in pregnancy:**

- Rubella IgG +ve |\_|, -ve |\_|; IgM +ve |\_|, -ve |\_|; UN |\_|
- Varicella IgG +ve |\_|, -ve |\_|; IgM +ve |\_|, -ve |\_|; UN |\_|
- Other (eg toxoplasma) Specify: \_\_\_\_\_ |\_|\_|\_|\_|\_|\_|\_|

**Confirmed Pathology during pregnancy**

- (0 = No, 1 = Yes, 9 = UN) .....|\_|
- Threatened abortion (before 22 wks gestation) (0 = No, 1 = Yes, 9 = UN) .....|\_|
- Premature spontaneous labour (22 - 37 wks.) (0 = No, 1 = Yes, 9 = UN) .....|\_|
- Antepartum haemorrhage (APH) (0 = No, 1 = Yes, 9 = UN) .....|\_|
- PIH (persistently > 140/90mmHg, no albuminuria) (0 = No, 1 = Yes, 9 = UN) .....|\_|
- Pre-eclampsia (hypertension with albuminuria) (0 = No, 1 = Yes, 9 = UN) .....|\_|
- Eclampsia (severe hypertension with seizures) (0 = No, 1 = Yes, 9 = UN) .....|\_|
- Placenta praevia (0 = No, 1 = Yes, 9 = UN) .....|\_|
- Abruption of placenta (0 = No, 1 = Yes, 9 = UN) .....|\_|
- Suspected IUGR –Intrauterine Growth Retardation (0 = No, 1 = Yes, 9 = UN) .....|\_|
- Blood group immunisation (0 = No, 1 = Yes, 9 = UN) .....|\_|
- Anaemia requiring transfusion (0 = No, 1 = Yes, 9 = UN) .....|\_|
- Units transfused in pregnancy (9 = UN) .....|\_|
- Cardiovascular disease (0 = No, 1 = Yes, 9 = UN) .....|\_|
- Acute Hepatitis (0 = No, 1 = Hepatitis A, 2 = Hepatitis B, 3 =Hepatitis C, 4 = Other, 9 = UN) .....|\_|
- Urinary Tract Infection (UTI) (0 = No, 1 = Yes, 9 = UN) .....|\_|
- Sexually Transmitted Disease (incl. Syphilis, HPV): (0 = No, 1 = Yes, 9 = UN) .....|\_|\_|\_|\_|\_|\_|\_|

**Hypothyroidism and Diabetes appearing during this pregnancy**

Hypothyroidism diagnosed during this pregnancy (0=No, 1=Yes, 9=UN) .....|\_|\_|

Gestational Diabetes / Impaired glucose tolerance (0 =No, 1 =Yes, 9 =UN) .....|\_|\_|

Other pathology in pregnancy (specify below) (0 =No, 1 =Yes, 9 =UN) .....|\_|\_|

***If diabetic before or during pregnancy:***

OGTT – Oral Glucose Tolerance Test done (0 = No, 1 = Yes, 9 = UN) .....|\_|\_|

If yes: OGTT level at 2 hours (mmol/l).....|\_|\_|.|\_|\_|

HbA1c test done (0 = No, 1 = Yes, 9 = UN) .....|\_|\_|

If yes: result in 1<sup>st</sup> trimester..... |\_|\_|\_| mmol/mol or |\_|\_| %

Insulin treatment given sometime during pregnancy (0 = No, 1 = Yes, 9 = UN) .....|\_|\_|

**Other pathology complicating pregnancy:**

(Office use: ICD-10 code) 1 - .....**O** |\_|\_|.|\_|\_|

2 - .....|\_|\_|\_|.|\_|\_|

***Details on Delivery***

Date of delivery (dd/mm/yyyy) ..... |\_|\_| |\_|\_| |\_|\_|\_|\_|

Site of delivery (1 = Hospital/clinic, 2 = Home , 3 = Underwater, 4 = Other site, 9 = UN) .....|\_|\_|

Onset (1= Induced, medical and/or surgical, 2 = Spontaneous onset, 3 = CS (Caesarean Section) elective / planned,  
4 = CS emergency for pathological condition eg APH, PET, fetal distress, 9 = UN) .....|\_|\_|

Any augmentation medical and/or surgical (0 = No, 1 = Yes, 9 = UN) .....|\_|\_|

Reason for Induction..... |\_|\_|\_|.|\_|\_|

Delivery (1 = Unassisted, vaginal, 2 = Forceps, 3 = Ventouse, 4 = Breech, 5 = Elective CS before labour,  
6 = Emergency CS before labour, 7 = Elective CS during labour, 8 = Emergency CS during labour, 9 = UN) .....|\_|\_|

Reason for Caesarean Section..... |\_|\_|\_|.|\_|\_|

Presentation at Delivery (1 = Vertex, 2 = Breech, 3 = Transverse, 4 = Unstable, 5 = Other, 9= UN).....|\_|\_|

Most senior attendant (0 = Unattended, 1 = Midwife/nurse, 2 = Foundation doctor, 3 = BST/HST,  
4 = Resident Specialist, 5 = Consultant, 6 = General Practitioner, 7 = Other, 9 = UN) .....|\_|\_|

Midwife in charge of delivery (Reg No) (9999 = UN).....|\_|\_|\_|\_|

Consultant responsible for delivery (Med Reg No) (9999 = UN).....|\_|\_|\_|\_|

Corticosteroids given (0 = No, 1 = Yes, 9 = UN) .....|\_|\_|

Analgesia (0 = None, 1 = Inhalation, 2 = Opioid, 3 = inhalation & opioid, 4 = Regional, 5 = inhalation & regional,  
6 = opioid & regional, 7 = inhalation, opioid and regional, 8 = Other, 9 = UN) .....|\_|\_|

Anaesthesia (0 = None, 1 = General (GA), 2 = Epidural/caudal, 3 = Spinal, 4 = epidural and spinal,  
5 = Epidural and general , 6 = Spinal and general, 8 = Other, 9 = UN) .....|\_|\_|

Rupture of membranes for more than 24 hours (0 = No, 1 = Yes, 9 = UN) .....|\_|\_|

Length of Stage 1 ..... |\_|\_| hrs |\_|\_| mins

Length of Stage 2 ..... |\_|\_| hrs |\_|\_| mins

**Details on Delivery (cont.)**

Perineal trauma /damage (0 = No, 1 = Yes, 9 = UN) .....|\_|

Episiotomy (0 = No, 1 = Yes, 9 = UN) .....|\_|

Tears (0 = No, 1 = 1<sup>st</sup> degree, 2 = 2<sup>nd</sup> degree, 3 = 3<sup>rd</sup> degree, 4 = 4<sup>th</sup> degree, 5 = Tear, not specified, 9 = UN) .....|\_|

Damage to cervix (0 = No, 1 = Yes, 9 = UN) .....|\_|

Hysterectomy after less than 48 hours (0 = No, 1 = Yes, 9 = UN) .....|\_|

Retained placenta /membranes (0 = No, 1 = Yes, 9 = UN) .....|\_|

Bleeding > 1000ml within 2 hrs (0 = No, 1 = Yes, 9 = UN) .....|\_|

Blood transfusion (units) .....|\_|\_|

    Haemoglobin level 7 g/dl or less (0 = No, 1 = Yes, 8 = Not applicable, 9 = UN) .....|\_|

Shoulder dystocia (0 = No, 1 = Yes, 9 = UN) .....|\_|

Maternal Eclamptic Seizures (0 = No, 1 = Yes, 9 = UN) .....|\_|

Surgery (exclude tubal ligation or CS) (0 = No, 1 = Yes, 9 = UN) .....|\_|

Embolisation (0 = No, 1 = Yes, 9 = UN) .....|\_|

Transfer from Delivery Unit (1 = Postnatal, 2 = HDU/ITU, 3 = Gynae ward, 4 = Home, 5 = Other, 9 = UN) |\_|

High Dependency Unit HDU / ITU required (0 = No, 1 = Yes, 9 = UN) .....|\_|

Other special conditions during delivery .....|\_|\_|\_|\_|.|\_|

    (Office use: ICD-10 code) .....|\_|\_|\_|\_|.|\_|

Maternal discharge (1 = Home, 2 = Transferred to health facility, 3 = Dead, 4 = Other, 9 = UN) .....|\_|

    Discharge days or hours after delivery (99 = UN) .....|\_|\_| days |\_|\_| hours

**Infant Details**

Birth order number (1 of 1, except in multiple gestation) .....|\_| of |\_|

Date of birth (dd/mm/yyyy) .....|\_|\_|\_| |\_|\_|\_| |\_|\_|\_|\_|\_|

Time of birth (hh:mm, 24 hr clock) .....|\_|\_|:|\_|\_|

Sex (1 = Male, 2 = Female, 3 = Indeterminate, 9 = UN) .....|\_|

Birth weight (grams) (9999 = UN) .....|\_|\_|\_|\_|

Best estimate of Gestation at delivery (in weeks; 99 = UN) .....|\_|\_|

Head circumference (nearest cm; 99 = UN) .....|\_|\_|

Cord blood pH at delivery (88 = not taken, 99 = UN).....|\_|\_|

Apgar score at 1 minute (99 = UN).....|\_|\_|

Apgar score at 5 minutes (99 = UN) .....|\_|\_|

Breast feeding at delivery unit (within first hour) (0 = No, 1 = Yes, 2 = Baby died, 9 = UN) .....|\_|

**Infant Details (Cont.)**

**Infant morbidity** (0 = No, 1 = Yes, 9 = UN) .....|\_|

RDS/Hyaline membrane disease (0 = No, 1 = Yes, 9 = UN) .....|\_|

Other respiratory conditions (0 = No, 1 = Yes, 9 = UN) .....|\_|

Seizure while at hospital (0 = No, 1 = Yes, 9 = UN) .....|\_|

Hyperbilirubinaemia (needing phototherapy) (0 = No, 1 = Yes, 9 = UN) .....|\_|

Sepsis (confirmed - positive blood culture) (0 = No, 1 = Yes, 9 = UN) .....|\_|

Other infant morbidity (specify below) (0 = No, 1 = Yes, 9 = UN) .....|\_|

Transfer from Delivery unit (1 = Nursery, 2 = NIPCU, 3 = Other hospital, 4 = Died, 5 = Other, 9 = UN) ....|\_|

Length of NPICU stay (days) (88= not applicable, 99 = UN) .....|\_|

    Use of surfactant (0 = No, 1 = Yes, 9 = UN) .....|\_|

    Mechanical Ventilation or CPAP (0 = No, 1 = Yes, 9 = UN) .....|\_|

Congenital malformations (most serious).....|\_|\_|.|\_| **Q**

(Office use: ICD-10 code) .....|\_|\_|\_|.|\_|

Other perinatal pathology (incl. infections).....|\_|\_|\_|.|\_| **P**

(Office use: ICD-10 code) .....|\_|\_|\_|.|\_|

Feeding method at discharge (1 = Breast only, 2 = Bottle only, 3 = Mixed, 4 = Died, 8 = Other, 9=UN) ..|\_|

Discharge days after birth (99 = UN) .....|\_|\_|

Method of infant discharge (1 = Home/Crèche, 2 = Transferred to health facility, 3 = Dead,  
4 = Still in hospital after 28 days, 9 = UN) .....|\_|

Outcome (1 = Born alive and lived at least 4 weeks, 2 = Antepartum stillbirth (no heart beat on admission),  
3 = Intrapartum stillbirth (heart beat heard on admission), 4 = Stillbirth, not known whether AP or IP, 5 = Died in 1<sup>st</sup> week  
of life, 6 = Died in 2<sup>nd</sup>, 3<sup>rd</sup> or 4<sup>th</sup> week of life).....|\_|

Date of death (if applicable - dd/mm/yyyy) .....|\_|\_||\_|\_||\_|\_|\_|\_|\_|

Cause of death (1 = Congenital malformations, 2 = Pregnancy-related disorders, 3 = Birth asphyxia/trauma,  
4 = Immaturity-related disorder, 5 = Infection, 6 = Other, 8 = Baby alive, 9 = UN) .....|\_|

(Office use: Underlying cause of death (UCD) ICD-10 code) .....|\_|\_|\_|\_|.|\_|

Hours lived before death.....|\_|\_|\_|\_| hours |\_|\_|\_| mins

**COMMENTS**

---



---



---
